# Supplementary material for: Heterolytic cleavage of Si–H bonds: reduction of imines using silane/high-valent oxo-molybdenum MoO2Cl2as a catalyst
Source: Royal Society of Chemistry journal article supplement (doi:10.1039/c3cy00727h), 2013-10-31
Supplement: c3cy00727h.pdf [file c3cy00727h.pdf]

## Supporting Information

# Heterolytic cleavage of Si–H bonds: Reduction of imines using silane/high-valent oxo-molybdenum MoO<sub>2</sub>Cl<sub>2</sub> as a catalyst

Yiou Wang, Piao Gu, Wenmin Wang and Haiyan Wei\*

Received (in XXX, XXX) Xth XXXXXXXXXX 20XX, Accepted Xth XXXXXXXXXX 20XX

DOI: 10.1039/b000000x

1. Complete reference of 9.
2. Table S1 The relative free energies of the key transition states obtained at M06(6-311++G(d,p)+ LANL2DZ), M06(6-311++G(d,p)+ SDD) and M06(6-311++G(d,p)+ QVZP) and MP2(6-311G(d,p)+ LANL2DZ) calculation level for MoO<sub>2</sub>Cl<sub>2</sub> mediated the hydrosilylation reaction are shown.
3. Table S2 The relative free energies of the key transition states obtained at B3LYP-D(6-311++G(2d,p)+ QVZP), M06(6-311++G(2d,p)+ QVZP) calculation level for MoO<sub>2</sub>Cl<sub>2</sub> mediated the hydrosilylation reaction are shown.
4. Table S3 The relative free energies with different solvation, (CH<sub>2</sub>Cl<sub>2</sub>, THF and Toluene) of the key transition states and the intermediates obtained at M06(6-311++G(2d,p)+ QVZP) calculation level for MoO<sub>2</sub>Cl<sub>2</sub> mediated the hydrosilylation reaction are shown.
5. Scheme S1 The energy profile for MoO<sub>2</sub>Cl<sub>2</sub> catalyzing the hydrosilylation of imines process through the [2+2] addition pathway. The solvation energies are included in parentheses, and the gas-phase energies are the values without parentheses.
6. Figure S1. The calculated geometric structures of the transition states along the [2+2] addition pathway.
7. Figure S2 The calculated geometric structures of the transition states for the transformation between the ion pair of **5anti**, **5syn** and **6syn**. The solvation energies are included in parentheses, and the gas-phase energies are the values without parentheses
8. Figure S3 The calculated geometric structures of other two isomer of **TS4syn**. The solvation energies are included in parentheses, and the gas-phase energies are the values without parentheses.
9. Figure S4 The detailed scan plot for the ionic hydrosilylation pathway from the adduct **3+im**.
10. Figure S5 The IRC plot for the ionic hydrosilylation pathway from the transition state **TS4anti**.
11. Table S4 Cartesian coordinates for all optimized structures in XYZ format.

### Complete reference of 9

Frisch, M. J. et al. *Gaussian 09*; Gaussian, Inc. Frisch, M. J.; Trucks, G. W.; Schlegel, H. B.; Scuseria, G. E.; Robb, M. A.; Cheeseman, J. R.; Montgomery, Jr., J. A.; Vreven, T.; Kudin, K. N.; Burant, J. C.; Millam, J. M.; Iyengar, S. S.; Tomasi, J.; Barone, V.; Mennucci, B.; Cossi, M.; Scalmani, G.; Rega, N.; Petersson, G. A.; Nakatsuji, H.; Hada, M.; Ehara, M.; Toyota, K.; Fukuda, R.; Hasegawa, J.; Ishida, M.; Nakajima, T.; Honda, Y.; Kitao, O.; Nakai, H.; Klene, M.; Li, X.; Knox, J. E.; Hratchian, H. P.; Cross, J. B.; Bakken, V.; Adamo, C.; Jaramillo, J.; Gomperts, R.; Stratmann, R. E.; Yazyev, O.; Austin, A. J.; Cammi, R.; Pomelli, C.; Ochterski, J. W.; Ayala, P. Y.; Morokuma, K.; Voth, G. A.; Salvador, P.; Dannenberg, J. J.; Zakrzewski, V. G.; Dapprich, S.; Daniels, A. D.; Strain, M. C.; Farkas, O.; Malick, D. K.; Rabuck, A. D.; Raghavachari, K.; Foresman, J. B.; Ortiz, J. V.; Cui, Q.; Baboul, A. G.; Clifford, S.; Cioslowski, J.; Stefanov, B. B.; Liu, G.; Liashenko, A.; Piskorz, P.; Komaromi, I.; Martin, R. L.; Fox, D. J.; Keith, T.; Al-Laham, M. A.; Peng, C. Y.; Nanayakkara, A.; Challacombe, M.; Gill, P. M. W.; Johnson, B.; Chen, W.; Wong, M. W.; Gonzalez, C.; and Pople, J. A.; Gaussian, Inc., Pittsburgh PA,, 2009.

**Table S1** The relative free energies of the intermediates and transition states obtained at M06(6-311++G(d,p)+ LANL2DZ), M06(6-311++G(d,p)+ SDD) and M06(6-311++G(d,p)+ QVZP) calculation level for MoO<sub>2</sub>Cl<sub>2</sub> mediated the hydrosilylation reaction are shown. The solvation energies are included in parentheses, and the gas-phase energies are the values without parentheses.

|                | M06<br>6-311++G(d,p) +<br>LANL2DZ) | M06<br>(6-311++G(d,p)+<br>SDD) | M06<br>(6-311++G(2d,p) + QVZP) | MP2<br>(6-311G(d,p)+<br>LANL2DZ) |
|----------------|------------------------------------|--------------------------------|--------------------------------|----------------------------------|
| <b>TS[2+2]</b> | 28.7(26.4)                         | 29.1                           | 30.9(29.0)                     | 38.8 (35.9)                      |
| <b>TS4anti</b> | 18.1(14.4)                         | 20.4                           | 25.4(21.4)                     | 20.0(19.7)                       |

These results have indicated that the ionic hydrosilylation pathway passing through **TS4anti** is the most favorable pathway at all level of calculation.

**Table S2** The relative free energies of the key transition states obtained at B3LYP-D(6-311++G(2d,p)+ QVZP), M06(6-311++G(2d,p)+ QVZP) calculation level for MoO<sub>2</sub>Cl<sub>2</sub> mediated the hydrosilylation reaction are shown.

|                | B3LYP<br>(6-311++G(2d,p) + QVZP) | M06<br>(6-311++G(2d,p) + QVZP) | B3LYP-sol<br>(6-311++G(2d,p) + QVZP) | M06-sol<br>(6-311++G(2d,p) + QVZP) |
|----------------|----------------------------------|--------------------------------|--------------------------------------|------------------------------------|
| <b>3+im</b>    | 11.1                             | 14.3                           | 13.0                                 | 17.2                               |
| <b>TS4anti</b> | 25.7                             | 25.4                           | 17.0                                 | 21.4                               |
| <b>4anti</b>   | 25.4                             | 25.3                           | 13.4                                 | 16.5                               |

**Table S3** The relative free energies with different solvation, (CH<sub>2</sub>Cl<sub>2</sub>, THF and Toluene) of the key transition states and the intermediates obtained at M06(6-311++G(2d,p)+ QVZP) calculation level for MoO<sub>2</sub>Cl<sub>2</sub> mediated the hydrosilylation reaction are shown.

|                | M06-gas<br>(6-311++G(2d,p) + QVZP) | M06- CH <sub>2</sub> Cl <sub>2</sub><br>(6-311++G(2d,p) + QVZP) | M06-THF<br>(6-311++G(2d,p) + QVZP) | M06-Toluene<br>(6-311++G(2d,p) + QVZP) |
|----------------|------------------------------------|-----------------------------------------------------------------|------------------------------------|----------------------------------------|
| <b>3+im</b>    | 14.3                               | 17.2                                                            | 16.4                               | 20.0                                   |
| <b>TS4anti</b> | 25.4                               | 21.4                                                            | 21.9                               | 27.9                                   |
| <b>4anti</b>   | 25.3                               | 16.5                                                            | 17.8                               | 25.9                                   |
| <b>5anti</b>   | 28.6                               | 12.0                                                            | 12.8                               | 23.7                                   |
| <b>TS5syn</b>  | 33.6                               | 30.7                                                            | 32.0                               | 37.7                                   |
| <b>5syn</b>    | 15.9                               | 7.5                                                             | 8.4                                | 16.8                                   |
| <b>6syn</b>    | 16.6                               | 7.8                                                             | 8.4                                | 17.0                                   |
| <b>TS7</b>     | 19.6                               | 12.5                                                            | 13.4                               | 21.2                                   |

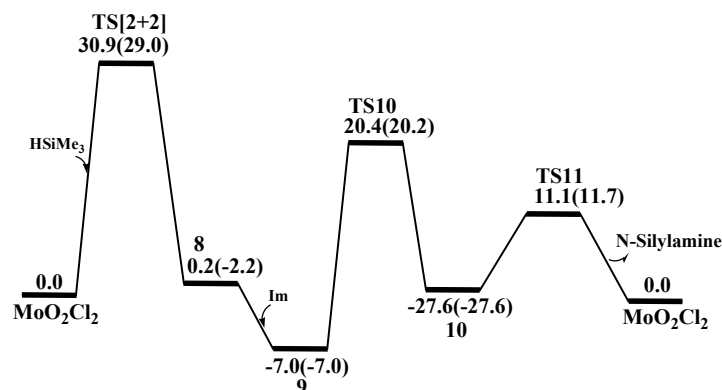

Scheme S1 The energy profile for  $\text{MoO}_2\text{Cl}_2$  catalyzing the hydrosilylation of imines process through the [2+2] addition pathway. The solvation energies are included in parentheses, and the gas-phase energies are the values without parentheses.

Figure S1. The calculated geometric structures of the transition states along the [2+2] addition pathway.

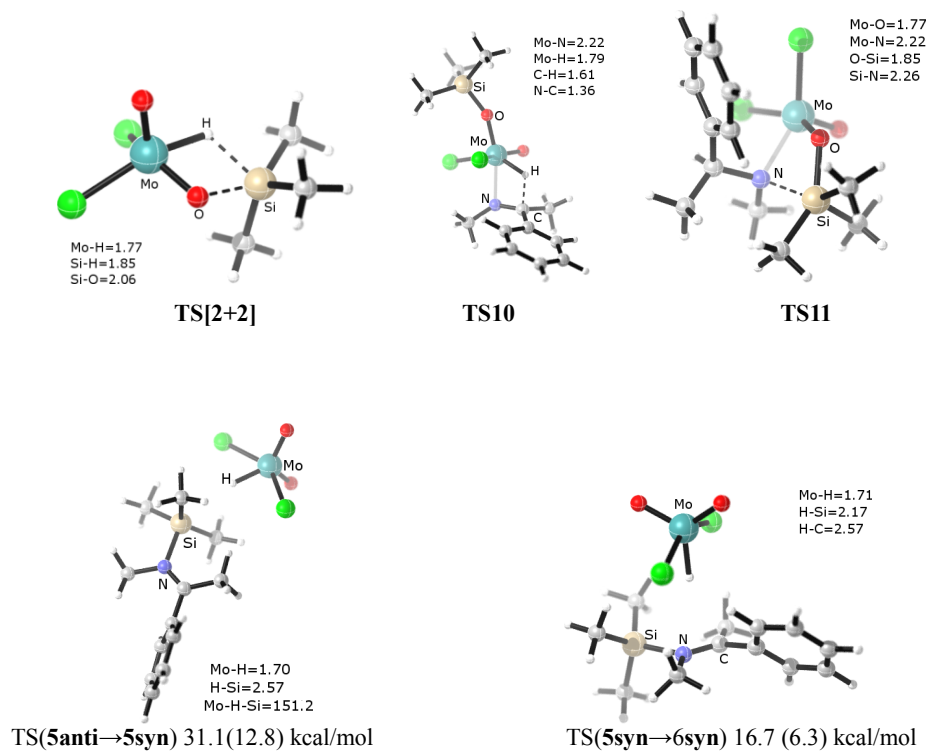

Figure S2 The calculated geometric structures of the transition states for the transformation between the ion pair of **5anti**, **5syn** and **6syn**. The solvation energies are included in parentheses, and the gas-phase energies are the values without parentheses.

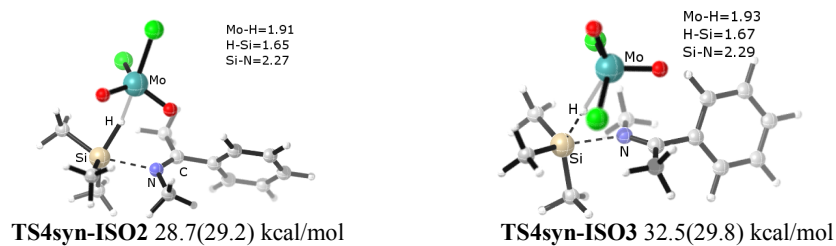

Figure S3 The calculated geometric structures of other two isomer of **TS4syn**. The solvation energies are included in parentheses, and the gas-phase energies are the values without parentheses.

Figure S4 The detailed scan plot for the ionic hydrosilylation pathway from the adduct **3+im**. (The first maximum point corresponds to the transition state TS4anti, the first minimum point corresponds to the first intermediate 4anti. The maximum point corresponds to the second transition state 5anti, and then the last point corresponds to the syn intermediate 5syn)

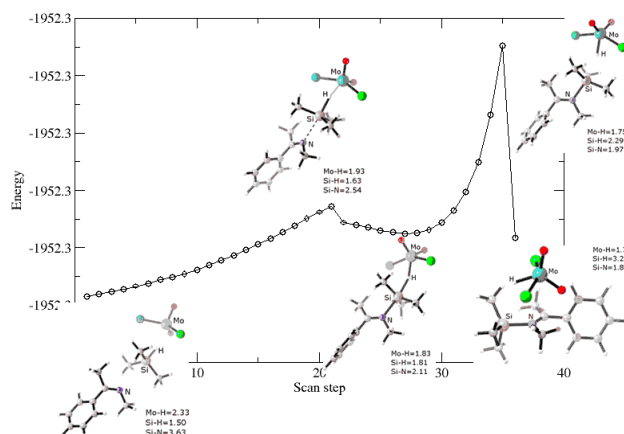

Figure S5 The IRC plot for the ionic hydrosilylation pathway from the transition state **TS4anti**. (From the last point of the IRC calculation (both forward and reverse calculations), we optimization the structures, which leads to the adduct of **3+im**, and **4anti**, respectively).

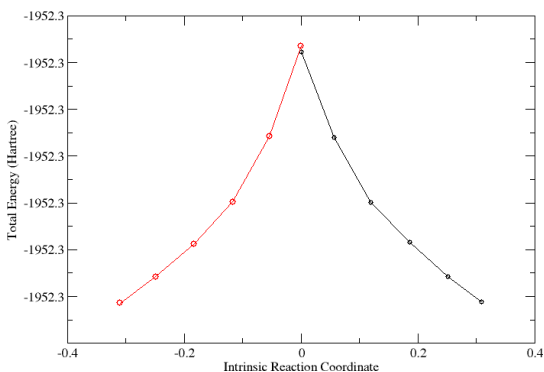

**Table S4** Cartesian coordinates for each structure calculated. (XYZ format).

|                |           |           |            |                |           |           |           |
|----------------|-----------|-----------|------------|----------------|-----------|-----------|-----------|
| <b>1</b>       |           |           |            | H              | -3.600965 | -1.708118 | -3.510147 |
| Mo             | 0.109824  | -0.384989 | 0.246467   | H              | -2.569668 | 2.396042  | -2.401461 |
| O              | -0.062374 | 0.719808  | 1.475190   | H              | -3.335423 | 1.611702  | -3.793056 |
| O              | 1.662329  | -0.219766 | -0.321355  | H              | -4.098122 | 1.525656  | -2.191283 |
| Cl             | -1.365225 | 0.078476  | -1.412072  | H              | -5.080090 | 0.330534  | -4.832612 |
| Cl             | -0.190556 | -2.482006 | 1.054927   | H              | -4.414982 | 1.194350  | -6.209382 |
| <b>TS[2+2]</b> |           |           |            | H              | -5.450984 | -0.227246 | -6.484346 |
| O              | 1.148240  | -1.255720 | -0.355794  | H              | -1.424796 | -2.458649 | -7.184201 |
| Mo             | -0.130813 | -0.193612 | 0.206998   | H              | -1.454085 | -2.056247 | -5.442128 |
| Cl             | -0.568068 | 2.100787  | -0.181769  | H              | -2.319898 | -3.479574 | -6.072587 |
| Si             | 2.791967  | -0.023091 | -0.292424  | <b>TS4anti</b> |           |           |           |
| O              | -0.519644 | -0.586312 | 1.769440   | Mo             | 3.510907  | -0.308961 | 0.059057  |
| Cl             | -1.912639 | -0.675526 | -1.179527  | O              | 3.905095  | -0.850368 | 1.591861  |
| H              | 1.339261  | 0.713545  | 0.582210   | O              | 4.845960  | -0.457286 | -0.929822 |
| C              | 3.525836  | 1.503586  | 0.533511   | Cl             | 3.577706  | 2.014622  | 0.488351  |
| C              | 2.638268  | 0.336592  | -2.107912  | Cl             | 2.278911  | -2.206693 | -0.653385 |
| C              | 3.765910  | -1.487219 | 0.308376   | H              | 1.842175  | 0.398069  | -0.588740 |
| H              | 4.832805  | -1.238784 | 0.327526   | Si             | 0.249839  | 0.652264  | -0.324326 |
| H              | 3.465294  | -1.744666 | 1.329030   | N              | -2.260556 | 0.757576  | 0.065427  |
| H              | 3.598574  | -2.363916 | -0.320698  | C              | -3.003946 | -0.264992 | 0.243562  |
| H              | 4.563795  | 1.611422  | 0.188978   | C              | -4.494129 | -0.247800 | 0.177589  |
| H              | 2.974285  | 2.409745  | 0.262184   | C              | -5.261624 | -0.540758 | 1.301498  |
| H              | 3.538761  | 1.420082  | 1.624313   | C              | -6.646747 | -0.550896 | 1.217805  |
| H              | 3.564168  | 0.789449  | -2.479159  | C              | -7.272785 | -0.294467 | 0.005955  |
| H              | 2.417764  | -0.565044 | -2.683698  | C              | -6.511760 | -0.018905 | -1.122493 |
| H              | 1.832895  | 1.060790  | -2.281630  | C              | -5.128252 | 0.010969  | -1.035824 |
| <b>3+im</b>    |           |           |            | C              | 0.262378  | 2.503253  | -0.578318 |
| Mo             | -0.063877 | 0.060200  | 0.681809   | C              | -0.288216 | -0.323187 | -1.832212 |
| O              | -1.459775 | 0.105039  | 1.582720   | C              | 0.355998  | 0.093322  | 1.463656  |
| O              | 1.163957  | 0.078383  | 1.802947   | C              | -2.860906 | 2.063628  | -0.136517 |
| Cl             | 0.286856  | 2.026780  | -0.452645  | C              | -2.423760 | -1.620253 | 0.490821  |
| Cl             | 0.232176  | -1.979071 | -0.333937  | H              | 1.149130  | 0.682305  | 1.941993  |
| H              | -1.729238 | 0.045575  | -0.952987  | H              | -4.773797 | -0.747155 | 2.250887  |
| Si             | -2.169094 | -0.046524 | -2.392311  | H              | -7.238993 | -0.765449 | 2.101726  |
| N              | -3.467127 | -0.601116 | -5.732579  | H              | -8.355976 | -0.311825 | -0.060290 |
| C              | -3.263967 | -1.600094 | -6.492967  | H              | -6.997976 | 0.175592  | -2.073239 |
| C              | -4.142317 | -2.032458 | -7.620803  | H              | -4.527995 | 0.230343  | -1.916404 |
| C              | -4.726395 | -3.297565 | -7.618439  | H              | -0.454672 | -1.381942 | -1.622901 |
| C              | -5.532774 | -3.702918 | -8.672233  | H              | -1.206215 | 0.104484  | -2.248866 |
| C              | -5.745883 | -2.856154 | -9.751141  | H              | 0.499264  | -0.266706 | -2.590256 |
| C              | -5.156185 | -1.599241 | -9.768833  | H              | 0.630148  | -0.962535 | 1.556326  |
| C              | -4.364076 | -1.187992 | -8.707225  | H              | -0.569665 | 0.270055  | 2.015116  |
| C              | -3.139826 | 1.516931  | -2.719949  | H              | 1.256370  | 2.820008  | -0.906374 |
| C              | -3.192216 | -1.605771 | -2.499640  | H              | -0.462746 | 2.814307  | -1.335185 |
| H              | -4.020912 | -1.589314 | -1.784842  | H              | 0.048713  | 3.034770  | 0.354364  |
| C              | -0.636069 | -0.101742 | -3.458424  | H              | -2.299839 | 2.803867  | 0.439772  |
| C              | -4.667989 | 0.192923  | -5.839934  | H              | -2.776390 | 2.349638  | -1.192438 |
| C              | -2.041742 | -2.439179 | -6.278512  | H              | -3.915748 | 2.114600  | 0.150433  |
| H              | -4.561593 | -3.965498 | -6.776704  | H              | -2.736629 | -2.300685 | -0.310179 |
| H              | -5.993511 | -4.685762 | -8.652435  | H              | -1.336765 | -1.616991 | 0.553909  |
| H              | -6.370213 | -3.176305 | -10.579451 | H              | -2.832785 | -2.036146 | 1.418689  |
| H              | -5.315430 | -0.935189 | -10.612860 | <b>4anti</b>   |           |           |           |
| H              | -3.903742 | -0.203030 | -8.718758  | Mo             | -0.180211 | -0.179486 | -0.634294 |
| H              | -0.080407 | -1.036848 | -3.331040  | O              | -0.282532 | -0.532350 | 1.001429  |
| H              | -0.940899 | -0.015324 | -4.507154  | O              | 1.408220  | 0.059613  | -1.125678 |
| H              | 0.037847  | 0.730328  | -3.229027  | Cl             | -0.856874 | 2.093703  | -0.585902 |
| H              | -2.578298 | -2.487151 | -2.284094  | Cl             | -0.415313 | -2.408213 | -1.483606 |
|                |           |           |            | H              | -1.643061 | -0.088912 | -1.735321 |

|              |            |           |            |             |           |           |           |
|--------------|------------|-----------|------------|-------------|-----------|-----------|-----------|
| Si           | -2.625497  | -0.198821 | -3.255880  | H           | -2.916439 | 1.355153  | 0.614195  |
| N            | -3.607337  | -0.678129 | -5.063241  | H           | -4.547766 | 0.630299  | 0.562534  |
| C            | -3.294572  | -1.687751 | -5.792635  | H           | -3.108115 | -0.395201 | 0.644957  |
| C            | -3.928865  | -1.975065 | -7.105810  | H           | -1.755196 | 2.102665  | -2.249251 |
| C            | -4.622361  | -3.165395 | -7.311714  | H           | -2.938729 | 1.991077  | -3.567060 |
| C            | -5.179792  | -3.440107 | -8.551761  | H           | -2.604123 | -1.868965 | -1.860004 |
| C            | -5.020727  | -2.544671 | -9.600010  | H           | -4.358718 | -1.937505 | -1.697521 |
| C            | -4.312462  | -1.366097 | -9.405338  | H           | -3.618073 | -1.517388 | -3.266252 |
| C            | -3.775709  | -1.076646 | -8.160725  | H           | -5.489037 | -0.206749 | -3.683555 |
| C            | -3.418224  | 1.471458  | -2.987645  | H           | -6.434298 | -0.605406 | -2.247417 |
| C            | -3.555399  | -1.594437 | -2.403215  | H           | -6.929018 | 0.759454  | -3.280922 |
| H            | -3.635986  | -1.367083 | -1.336338  | H           | -5.006009 | 3.381389  | -0.028180 |
| C            | -0.953943  | -0.041502 | -4.111941  | H           | -3.617378 | 2.934860  | -1.044222 |
| C            | -4.739626  | 0.168868  | -5.421583  | H           | -4.744206 | 4.216290  | -1.542317 |
| C            | -2.227548  | -2.652663 | -5.402457  |             |           |           |           |
| H            | -4.744327  | -3.871494 | -6.494583  | <b>5syn</b> |           |           |           |
| H            | -5.734252  | -4.360888 | -8.701001  | C           | -1.297976 | 5.142584  | 5.331204  |
| H            | -5.446994  | -2.766972 | -10.572946 | C           | -1.556452 | 4.251367  | 4.301422  |
| H            | -4.178812  | -0.668515 | -10.225783 | C           | -0.668741 | 3.201931  | 4.060157  |
| H            | -3.222896  | -0.153444 | -8.004480  | C           | 0.469557  | 3.057782  | 4.857434  |
| H            | -0.267275  | -0.858567 | -3.875491  | C           | 0.735273  | 3.972882  | 5.862572  |
| H            | -1.038174  | 0.053686  | -5.199654  | C           | -0.153358 | 5.011957  | 6.105128  |
| H            | -0.502604  | 0.882279  | -3.729267  | C           | -0.936024 | 2.196877  | 3.009189  |
| H            | -3.070376  | -2.569036 | -2.483916  | N           | -1.077068 | 2.497688  | 1.754532  |
| H            | -4.567118  | -1.666029 | -2.820364  | Si          | -1.387520 | 1.245142  | 0.373045  |
| H            | -2.882662  | 1.978861  | -2.179061  | C           | -2.712767 | 0.017928  | 0.826900  |
| H            | -3.346089  | 2.109718  | -3.874044  | C           | -1.033939 | 0.796566  | 3.493903  |
| H            | -4.469283  | 1.396477  | -2.692170  | C           | 0.306910  | 0.475535  | 0.175945  |
| H            | -5.335928  | 0.346688  | -4.523289  | C           | -1.800673 | 2.190098  | -1.168993 |
| H            | -4.387080  | 1.141381  | -5.778178  | Mo          | -4.856322 | 3.688679  | 1.806243  |
| H            | -5.372637  | -0.282791 | -6.187140  | O           | -6.522963 | 3.455551  | 1.722341  |
| H            | -1.407610  | -2.593653 | -6.128142  | O           | -4.290540 | 4.984213  | 2.755244  |
| H            | -1.826322  | -2.502488 | -4.402274  | Cl          | -4.344732 | 1.994162  | 3.460592  |
| H            | -2.623469  | -3.671166 | -5.477201  | Cl          | -4.420052 | 4.637718  | -0.333513 |
|              |            |           |            | H           | -3.765540 | 2.592187  | 1.046256  |
| <b>5anti</b> |            |           |            | H           | -3.404503 | -0.054985 | -0.019627 |
| Mo           | 0.089653   | -0.007451 | 0.132233   | H           | -2.295082 | -0.977655 | 1.013039  |
| O            | -0.207988  | -0.119973 | 1.792419   | H           | -3.306206 | 0.325405  | 1.693358  |
| O            | 1.715066   | 0.048199  | -0.307872  | H           | -2.682664 | 2.830582  | -1.066685 |
| H            | -1.185050  | 0.105795  | -1.060113  | H           | 0.302211  | -0.191628 | -0.693531 |
| Si           | -3.430873  | 0.380612  | -1.645331  | H           | -0.966472 | 2.788369  | -1.547207 |
| N            | -5.204761  | 1.099366  | -2.086489  | H           | 0.629351  | -0.111802 | 1.040927  |
| C            | -5.581765  | 2.283988  | -1.740315  | H           | -2.028074 | 1.435407  | -1.933004 |
| C            | -6.963103  | 2.779080  | -1.942700  | H           | 1.061634  | 1.247985  | -0.011588 |
| C            | -8.029476  | 2.126557  | -1.323499  | H           | -1.023829 | 0.042693  | 2.709126  |
| C            | -9.316392  | 2.623230  | -1.451934  | H           | -0.229419 | 0.595352  | 4.206025  |
| C            | -9.550020  | 3.759319  | -2.215815  | H           | -1.977309 | 0.713482  | 4.048260  |
| C            | -8.492984  | 4.408807  | -2.837926  | H           | 1.167020  | 2.244526  | 4.674911  |
| C            | -7.199380  | 3.932836  | -2.687841  | H           | 1.633046  | 3.868520  | 6.463028  |
| C            | -3.541215  | -1.393849 | -2.181816  | H           | 0.046392  | 5.719929  | 6.903359  |
| C            | -3.511677  | 0.528540  | 0.216556   | H           | -2.003347 | 5.944258  | 5.523083  |
| C            | -2.403825  | 1.415548  | -2.802847  | H           | -2.462454 | 4.369054  | 3.711414  |
| Cl           | -0.427648  | -2.263376 | -0.457736  | C           | -0.890248 | 3.875690  | 1.271869  |
| Cl           | -0.396427  | 2.356743  | -0.058435  | H           | -0.233330 | 3.850793  | 0.398507  |
| C            | -6.076145  | 0.221118  | -2.867818  | H           | -1.851498 | 4.303127  | 0.967205  |
| C            | -4.663656  | 3.236789  | -1.060167  | H           | -0.439264 | 4.501320  | 2.039829  |
| H            | -1.729211  | 0.728144  | -3.325942  |             |           |           |           |
| H            | -6.374006  | 4.448145  | -3.171331  | <b>6syn</b> |           |           |           |
| H            | -8.674081  | 5.295826  | -3.435837  | Mo          | 0.424061  | -1.369019 | -0.153376 |
| H            | -10.559743 | 4.142149  | -2.322655  | O           | -0.140453 | -1.426519 | 1.435124  |
| H            | -10.139827 | 2.121478  | -0.954568  | O           | 2.024776  | -0.850929 | -0.378407 |
| H            | -7.844290  | 1.238929  | -0.723727  | Cl          | -0.579447 | 0.759376  | -0.804884 |





|    |           |           |           |   |           |           |           |
|----|-----------|-----------|-----------|---|-----------|-----------|-----------|
| O  | -3.567414 | -0.832913 | 1.783186  | H | 0.965185  | -1.324047 | -1.122386 |
| O  | -4.609729 | -1.067855 | -0.906573 | H | 2.089451  | -3.464447 | -1.546236 |
| H  | -1.935751 | 0.092361  | -0.514599 | H | 4.299860  | -3.943405 | -0.531341 |
| Si | 0.259501  | 1.398168  | -0.230042 | H | 5.364638  | -2.273691 | 0.956325  |
| N  | 2.155723  | 1.037806  | -0.244684 | H | 4.214794  | -0.155759 | 1.454669  |
| C  | 2.652219  | -0.151618 | -0.122548 | H | -1.237208 | 1.812133  | 1.621454  |
| C  | 4.105533  | -0.394559 | 0.014340  | H | -0.338474 | 3.163184  | 2.349483  |
| C  | 4.808141  | 0.173628  | 1.077970  | H | -1.698103 | 3.473561  | 1.267767  |
| C  | 6.153255  | -0.107967 | 1.251020  | H | -0.360052 | 3.203438  | -2.521532 |
| C  | 6.811286  | -0.936772 | 0.351564  | H | -1.630355 | 3.762907  | -1.428681 |
| C  | 6.118581  | -1.499341 | -0.711374 | H | 0.831125  | 5.325517  | 0.096530  |
| C  | 4.764849  | -1.246811 | -0.870391 | H | 2.054055  | 4.310528  | 0.868747  |
| C  | 0.102144  | 3.247143  | -0.096583 | H | 2.016389  | 4.471406  | -0.896543 |
| C  | -0.234196 | 0.667406  | 1.408330  | H | 0.856989  | 0.812141  | -2.294911 |
| C  | -0.168904 | 0.877865  | -1.966162 | H | 1.860710  | 2.283931  | -2.235760 |
| Cl | -3.641122 | 1.811734  | 0.077752  | H | 2.595871  | 0.704076  | -1.899434 |
| Cl | -1.784378 | -2.386553 | -0.269481 | H | 1.470122  | 1.955439  | 2.230463  |
| C  | 3.010744  | 2.209889  | -0.448544 | H | 0.704099  | 0.343988  | 2.289573  |
| C  | 1.795417  | -1.363232 | -0.062971 | H | 2.434477  | 0.491930  | 2.559737  |
| H  | -1.109937 | 1.357728  | -2.253947 |   |           |           |           |
| H  | 4.225034  | -1.695875 | -1.699271 |   |           |           |           |
| H  | 6.631214  | -2.146909 | -1.414795 |   |           |           |           |
| H  | 7.867192  | -1.149294 | 0.483489  |   |           |           |           |
| H  | 6.689727  | 0.320683  | 2.090993  |   |           |           |           |
| H  | 4.291320  | 0.817581  | 1.784834  |   |           |           |           |
| H  | -0.420625 | -0.407933 | 1.417361  |   |           |           |           |
| H  | 0.550804  | 0.905965  | 2.139983  |   |           |           |           |
| H  | -1.154222 | 1.162318  | 1.737338  |   |           |           |           |
| H  | -0.292280 | -0.198194 | -2.109525 |   |           |           |           |
| H  | 0.620424  | 1.245537  | -2.637534 |   |           |           |           |
| H  | -0.978578 | 3.429065  | -0.013855 |   |           |           |           |
| H  | 0.567961  | 3.661273  | 0.803082  |   |           |           |           |
| H  | 0.456546  | 3.793625  | -0.975194 |   |           |           |           |
| H  | 2.592077  | 2.800847  | -1.267007 |   |           |           |           |
| H  | 3.016509  | 2.837202  | 0.447369  |   |           |           |           |
| H  | 4.032392  | 1.924879  | -0.698149 |   |           |           |           |
| H  | 1.805576  | -1.752759 | 0.963321  |   |           |           |           |
| H  | 0.756264  | -1.225686 | -0.363600 |   |           |           |           |
| H  | 2.240479  | -2.149119 | -0.680640 |   |           |           |           |

**TS5syn→6syn**

|    |           |           |           |
|----|-----------|-----------|-----------|
| Mo | -2.036528 | -1.041736 | 0.037707  |
| O  | -3.537958 | -0.267863 | -0.052430 |
| Cl | -1.586335 | -0.762591 | 2.379672  |
| Cl | -1.334566 | -0.673698 | -2.253512 |
| H  | -0.605193 | -0.102907 | 0.123815  |
| O  | -2.015927 | -2.732738 | -0.024822 |
| Si | 0.211607  | 2.947591  | -0.087459 |
| N  | 1.375698  | 1.492431  | -0.359808 |
| C  | 1.817377  | 0.660934  | 0.536983  |
| C  | 2.519949  | -0.588695 | 0.190209  |
| C  | 1.932449  | -1.523526 | -0.667266 |
| C  | 2.568302  | -2.730875 | -0.906543 |
| C  | 3.802577  | -2.999537 | -0.331358 |
| C  | 4.398830  | -2.066870 | 0.507260  |
| C  | 3.749862  | -0.876618 | 0.787808  |
| C  | 1.692385  | 1.302551  | -1.784800 |
| C  | -0.837414 | 2.815292  | 1.440897  |
| C  | -0.881602 | 2.977992  | -1.587851 |
| C  | 1.392399  | 4.389888  | -0.000765 |
| C  | 1.604604  | 0.903074  | 1.982361  |
| H  | -1.418484 | 2.029770  | -1.710667 |
